# Supplementary material
Source: PubMed Central journal article supplement (PMC5218886)
Supplement: NIHMS832469-supplement-2.pdf [file NIHMS832469-supplement-2.pdf]

## SUPPLEMENTARY FIGURES

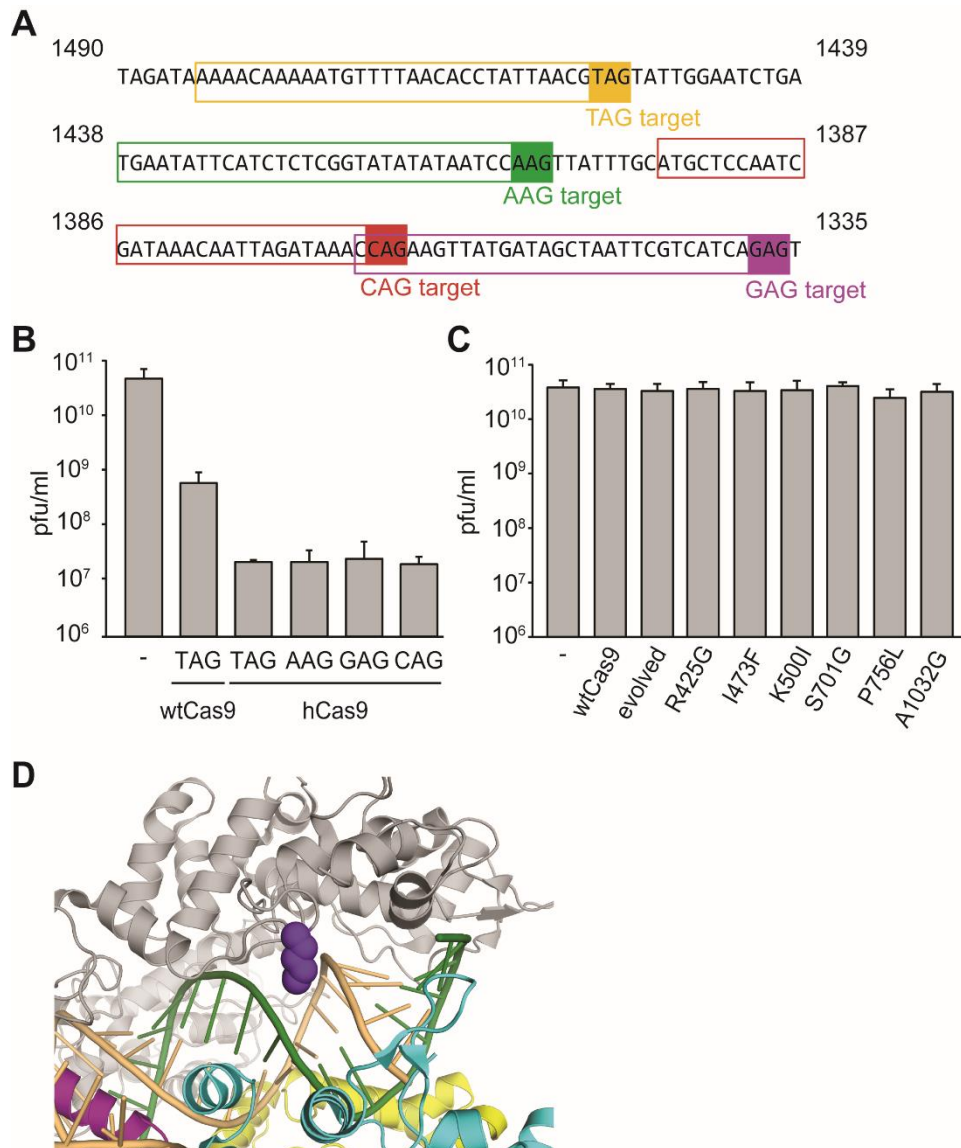

### Supplemental figure S1. Protection of host cells by hCas9 programmed against different NAG-flanked targets. Related to Fig. 1.

(A) The ability of hCas9 to target protospacers with different PAM was tested by measuring phage propagation in cells harboring CRISPR-Cas systems containing either wtCas9 or hCas9 and programmed to target the sequences shown, which are followed by TAG, AAG, GAG or CAG PAMs.

(B) Phage propagation was measured as the number of plaque forming units (pfu) per ml of stock, on cells targeting the TAG, AAG, GAG, and CAG-adjacent protospacers and hCas9.

(C) Measurement of pfu formation on staphylococci carrying plasmids with different *cas9* mutations after infection with  $\phi 85$ , a phage lacking the target recognized in  $\phi NM4\gamma 4$ .

(D) Location of residue K500 on the Cas9:sgRNA:target DNA ribonucleoprotein (PDB 4UN3). Purple, K500; orange, sgRNA; green, target DNA (the GG PAM highlighted in red); grey, alpha-helical (REC) lobe; yellow, HNH domain; light blue, RuvC domain; blue, PAM-interacting CTD.

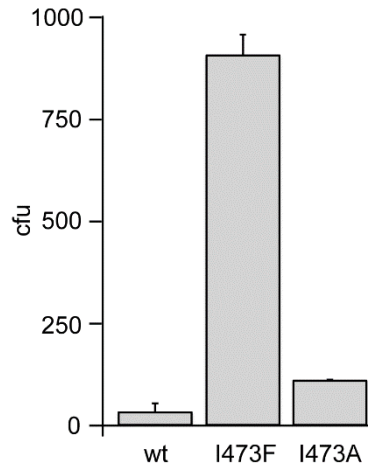

**Supplemental figure S2. CRISPR-Cas immune response of cells expressing Cas9<sup>I473A</sup>.** Related to Fig. 2. Cultures harboring plasmids with *tracrRNA*, *cas1*, *cas2* and *csn2* genes, and either wild-type, I473F or I473A cas9 alleles, were infected with  $\Phi$ NM4 $\gamma$ 4 phage on top agar media and poured on plates. After 24 hours of incubation at 37 °C the CRISPR-surviving colonies were counted.

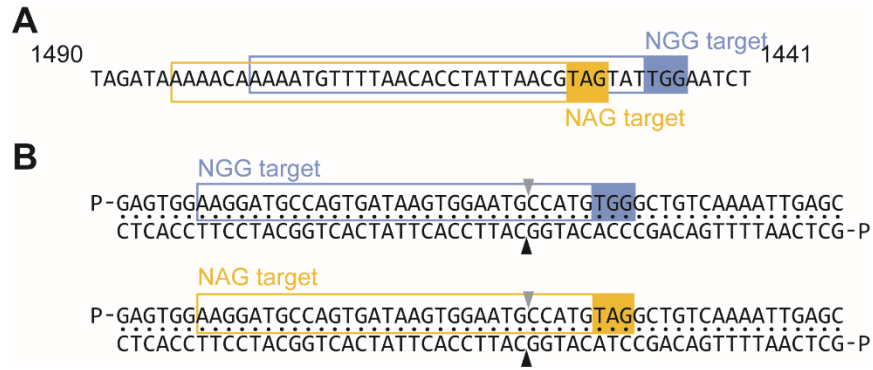

**Supplemental figure S3. In vivo and in vitro targets.** Related to Fig. 3.

(A) Region of the  $\Phi$ NM4 $\gamma$ 4 phage genome (nucleotides 1441 to 1490) containing the TAG- and TGG-flanked protospacers, yellow and blue respectively, used in Figs. 3A and 3B.

(B) Sequences of the dsDNA target oligonucleotides used in Fig. 3C. The protospacer sequence is the same, but it is flanked by either a TAG (yellow) or TGG (blue) PAM sequence. Radiolabel is at the 5' end (P). Grey and black arrowheads mark the cleavage sites of the RuvC and HNH domains, respectively.

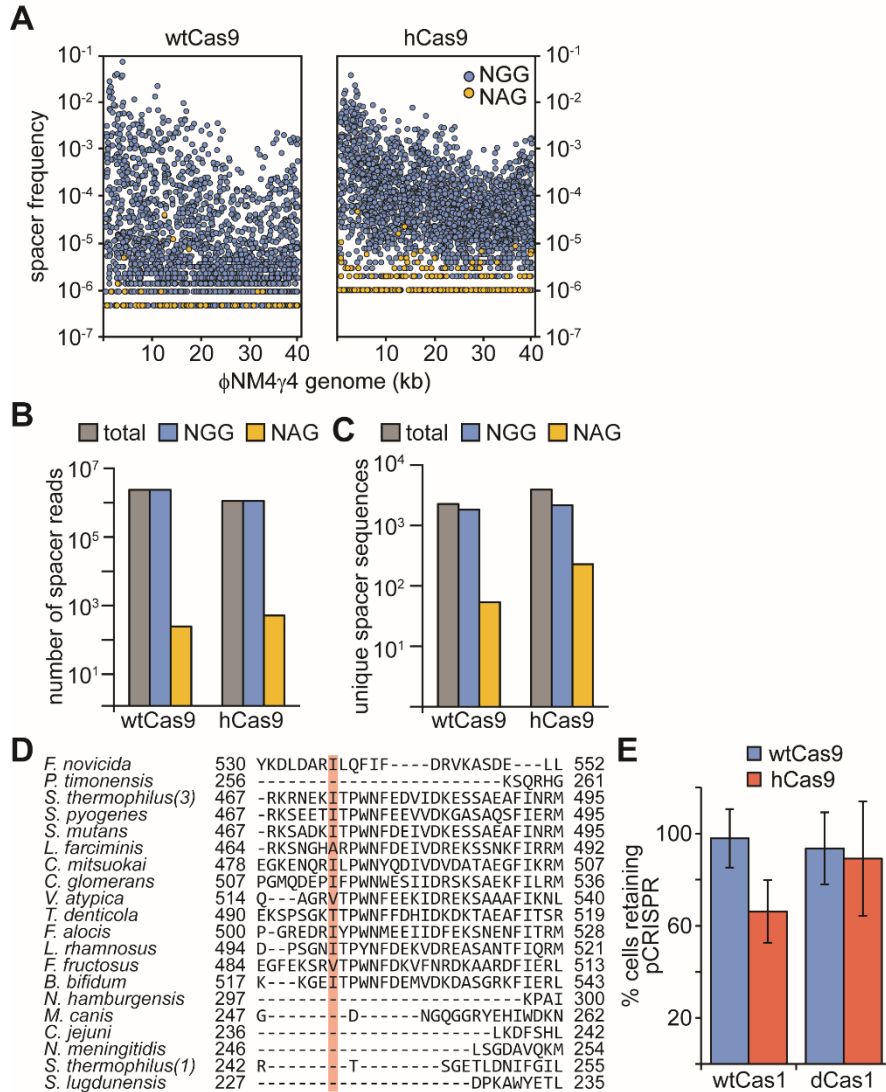

**Supplemental figure S4. Analysis of next-generation sequencing results.** Related to Fig. 4.

(A) Data presented in Fig. 4B and in Supplementary Data File was plotted as the the number of reads for each spacer sequence across the phage genome, normalized by the total number of spacer reads obtained. Spacers matching protospacers with NGG PAMs are shown in blue, with NAG PAMs in yellow.

(B) Quantification of the data shown in panel A.

(C) Quantification of the data shown in Fig. 4B.

(D) Alignment of Cas9 protein sequences belonging to type II CRISPR-Cas systems. Highlighted in orange is the I473 residue. An equivalent residue is not found in some type II-B and II-C systems.

(E) Fraction (%) of staphylococci retaining the plasmid harboring *wtcas9* and *hcas9* after 10 days of culture; with one transfer (1:100 dilution into fresh media) per day. Cells were plated in solid media with and without chloramphenicol, an antibiotic that selects for cells harboring the pCRISPR plasmid. The fraction of staphylococci carrying this plasmid was obtained dividing the chloramphenicol-resistant cfu by the total cfu count.

## SUPPLEMENTARY TABLES

**Supplementary table S1. Related to Fig. 2. Spacer sequences acquired by wtCas9-expressing cells.**

| Strain | Sequence                         | PAM | Location on $\phi$ NM4y4 | Strand |
|--------|----------------------------------|-----|--------------------------|--------|
| RH71   | ataaataaaaaagttactactcacacacta   | agg | 258                      | -      |
| RH64   | cgaactaggaagaaaaatcgccatcaattca  | agg | 453                      | -      |
| RH69   | aatagagatactttatcctaatgatacac    | ggg | 805                      | +      |
| RH51   | tgatacacgggagaaacaaaaccatcctacc  | cgg | 827                      | +      |
| RH99   | tgatacacgggagaaacaaaaccatcctacc  | cgg | 827                      | +      |
| RH47   | gagaacaaaaccatcctaccggtaataaaa   | tgg | 837                      | +      |
| RH107  | tttattttgcgttagaattgacacctcaaga  | agg | 873                      | +      |
| RH127  | tttattttgcgttagaattgacacctcaaga  | agg | 873                      | +      |
| RH57-2 | tttattttgcgttagaattgacacctcaaga  | agg | 873                      | +      |
| RH57-1 | tttagcgatattaattatgctcgtagaagaat | cgg | 1241                     | +      |
| RH63   | agtattggaatctgatgaatattcatctct   | cgg | 1423                     | -      |
| RH40   | aaaaatgttttaacacctattaacgtagtat  | tgg | 1448                     | -      |
| RH85   | aatattcatcagattccaatactacgttaat  | agg | 1461                     | +      |
| RH36   | ttcttcgctctatatgtgttttctgggtgt   | tgg | 2810                     | -      |
| RH109  | acaaatttttcttcgctctatatgtgttttc  | tgg | 2816                     | -      |
| RH10   | ccaatttagaaatattaatcagagtgctgt   | tgg | 2981                     | -      |
| RH42   | agaaaatttatacattgattattcaccaac   | agg | 2983                     | +      |
| RH7    | gctaagactgtgaagcataatactgctact   | agg | 3087                     | -      |
| RH33   | gctaagactgtgaagcataatactgctact   | agg | 3087                     | -      |
| RH8    | ttttaagctattcattttaaagggtcatat   | ggg | 3400                     | +      |
| RH42   | gtgttctcttcaatccattcatctattgct   | tgg | 3502                     | -      |
| RH85   | atgaatggattgaagagaacacagacgaac   | agg | 3540                     | +      |
| RH120  | ggagtaactaatatctgaattgttatcagt   | tgg | 3650                     | -      |
| RH97   | attagtactccacaaatagaaatagagct    | agg | 3698                     | +      |
| RH86   | ccacaaatagaaatagagctagggagttaa   | cgg | 3709                     | +      |
| RH83   | tagtttttgagtagtcttactttttcttg    | tgg | 3822                     | -      |
| RH32   | acgaaagcgtctttatctctttagcaaacg   | tgg | 3934                     | -      |
| RH30   | aaataagtctaaaaaaccaacgtttaatgat  | tgg | 4197                     | +      |
| RH52   | aaataagtctaaaaaaccaacgtttaatgat  | tgg | 4197                     | +      |
| RH55-2 | gaacgaattgtcagtagtacagattaat     | agg | 4241                     | +      |
| RH55-1 | aagaagaatacaaatccactttgttattac   | agg | 4283                     | +      |
| RH11   | gcattacggacgtagtagaagcaattagaaa  | tgg | 4577                     | +      |
| RH26-1 | aaaaacaattgattgaattagttactcgatt  | agg | 4866                     | +      |
| RH44   | tagcttagattttgataccaatgatcttat   | tgg | 4917                     | +      |
| RH77   | tagcttagattttgataccaatgatcttat   | tgg | 4917                     | +      |
| RH25   | cggatttttcatttattaaaccttacaaaa   | agg | 5009                     | +      |
| RH115  | tggatatgacgaccaagatttagcgtttta   | agg | 5166                     | +      |
| RH71   | ataacgacggtagttattccgctcgttgctac | tgg | 5238                     | +      |
| RH36   | taatacaggtttttacaaaagctttaccat   | agg | 5991                     | +      |
| RH16-1 | ctttaatgttttaaaagaatagcatcatt    | tgg | 6436                     | +      |

**Supplementary table S2. Related to Fig. 2. Spacer sequences acquired by hCas9-expressing cells.**

| Strain | Sequence                         | PAM | Location on $\phi$ NM4y4 | Strand |
|--------|----------------------------------|-----|--------------------------|--------|
| RH213  | aatagagatactttatctaacatgatacac   | ggg | 805                      | +      |
| RH214  | tgatacacgggagaaacaaacatcctacc    | cgg | 827                      | +      |
| RH177  | gagaacaaaacatcctacccggtaataaa    | tgg | 837                      | +      |
| RH193  | agtattggaatctgatgaatattcatctct   | cgg | 1423                     | -      |
| RH216  | aaaaatgttttaacacctattaacgtagtat  | tgg | 1448                     | -      |
| RH206  | aatattcatcagattccaatactacgttaat  | agg | 1461                     | +      |
| RH166  | ttcttcgcctctatatgtgttttctgggtgt  | tgg | 2810                     | -      |
| RH199  | aaataagtctaaaaaaccaacgtttaatgat  | tgg | 4197                     | +      |
| RH174  | aataagatcattgggtatcaaaatctaagct  | agg | 4889                     | -      |
| RH195  | cggatTTTTcatttattaaccttacaaaa    | agg | 5009                     | +      |
| RH210  | cggatTTTTcatttattaaccttacaaaa    | agg | 5009                     | +      |
| RH187  | cgacataacgctaatacatgtttgcatag    | tgg | 5695                     | -      |
| RH205  | taatacaggTTTTtacaaaagctttaccat   | agg | 5991                     | +      |
| RH211  | TTTTtatttaagtattcgataatttctttata | ggg | 7355                     | -      |
| RH202  | tgtatgtcgtttgatacgatccatcaacat   | tgg | 8123                     | -      |
| RH175  | attagactTTTactttccattacttaaatca  | tgg | 9043                     | +      |
| RH215  | attagactTTTactttccattacttaaatca  | tgg | 9043                     | +      |
| RH164  | ctaatactgTTTTaattaagttatcgatatc  | cgg | 9097                     | -      |
| RH185  | atttatatccgatcttatacgaagtaaaga   | agg | 13617                    | +      |
| RH208  | gcaaagttgagcgatcagcttgattgatg    | agg | 13783                    | +      |
| RH200  | ggaatatgatagcaattcaattgcacagta   | tgg | 13911                    | +      |
| RH203  | aaaatgcaagaattaaactaccaccatat    | agg | 14402                    | -      |
| RH169  | gataaaatcaaacaacttcacgacgcaataa  | cgg | 15028                    | +      |
| RH198  | gataaaatcaaacaacttcacgacgcaataa  | cgg | 15028                    | +      |
| RH197  | cgagtccaacacgtcatcaaattcttttat   | agg | 16180                    | -      |
| RH168  | atatacacacatactaaacctgaacgatta   | agg | 16252                    | +      |
| RH209  | tatgtgactctattagagcctcaatatgctt  | agg | 16314                    | -      |
| RH178  | taagaatatagatccctataatgttattttgt | tgg | 16769                    | +      |
| RH189  | gaatatagatccctataatgttattttgt    | tgg | 16769                    | +      |
| RH176  | ctcatcaatatcattctgattggttatttt   | ggg | 17669                    | -      |
| RH179  | attgaaaagatacgtatgcacattacaca    | agg | 18135                    | +      |
| RH204  | ctaagatagctaaagcaatacgtgatgatgt  | cgg | 18192                    | +      |
| RH196  | gaacacgtgatactcatcgtcatttagatg   | ggg | 18365                    | +      |
| RH180  | ctaactctttcgaatgataacgatctaattc  | agg | 19067                    | -      |
| RH173  | tttgatgaaattttagttgttcagatgtagt  | agg | 21085                    | -      |
| RH192  | taactactacgacttaagcaggtgccata    | tgg | 21278                    | +      |
| RH212  | taactactacgacttaagcaggtgccata    | tgg | 21278                    | +      |
| RH201  | aaaaataaggcaactgacagctagatattt   | agg | 23282                    | +      |
| RH165  | tccattttgctggtgattcttctatgctatc  | cgg | 37541                    | -      |
| RH170  | cctacgaatatgaacgacacaaatgattta   | ggg | 38151                    | +      |

**Supplementary table S3. Related to Experimental Procedures. Oligonucleotides used in this study.**

| <b>Name</b> | <b>Sequence</b>                                                                                                                        |
|-------------|----------------------------------------------------------------------------------------------------------------------------------------|
| H024        | aaacaaaaacaaaatgttttaacacctattaacgg                                                                                                    |
| H025        | aaaaccgttaatataggtgttaaacatttttgTTTT                                                                                                   |
| H029        | aaacaaaaatgttttaacacctattaacgtagtatg                                                                                                   |
| H030        | aaaacatactacgttaatataggtgttaaacattttt                                                                                                  |
| H050        | aaaacaaaaagcgcaagaagaatcaaccagcgca                                                                                                     |
| H052        | aaaacttttttcaaattgagttatgttcatataa                                                                                                     |
| H101        | gctattttgagaggacaagaagacttttatcc                                                                                                       |
| H102        | ggataaaagtcttctgtcctctcaaatagc                                                                                                         |
| H103        | ggaagtctgaagaacatttaccatgg                                                                                                             |
| H104        | ccatggggtaaatgtttcttcagacttcc                                                                                                          |
| H105        | gacaaactttgatataaatcttccaaatgaaaaagtactacc                                                                                             |
| H106        | ggtagtactttttcatttggagatttatatcaaagtgtgct                                                                                              |
| H107        | ccatgatgatggtttgacatttaagaagac                                                                                                         |
| H108        | gtcttctttaaatgtcaaacatcatcatgg                                                                                                         |
| H109        | ggcgccataagctagaaaatatcg                                                                                                               |
| H110        | cgatattttctagcttatgccgcc                                                                                                               |
| H111        | gcaagaaataggcaaaggaaccgc                                                                                                               |
| H112        | gcggttcctttgcctatttcttgc                                                                                                               |
| H207        | ggaagtctgaagaacagctaccatgg                                                                                                             |
| H208        | ccatggggtagctgtttcttcagacttcc                                                                                                          |
| H293        | gcaaaaatggataagaataactcaataggc                                                                                                         |
| H294        | tattgagtatttcttatccatttttgcctcc                                                                                                        |
| H295        | aacacgcattgatttgagtcagc                                                                                                                |
| H296        | tcctagctgactcaaatcaatgcg                                                                                                               |
| H372        | nnnnnactaggggcttttcaagactg                                                                                                             |
| H373        | nnnnnactgaagaaatcaaccagcgc                                                                                                             |
| H374        | nnnnnctgaggggcttttcaagactg                                                                                                             |
| H375        | nnnnnctggaagaaatcaaccagcgc                                                                                                             |
| H376        | nnnnntgaaggggcttttcaagactg                                                                                                             |
| H377        | nnnnntgagaagaaatcaaccagcgc                                                                                                             |
| H378        | caggggcttttcaagactgnnnnnnnngagacaaatagtgcg                                                                                             |
| H379        | cagtcttgaaaagcccctg                                                                                                                    |
| H546        | aaactgaatattcatctctcggtatatataatccg                                                                                                    |
| H547        | aaaacggattatatataaccgagagatgaatattca                                                                                                   |
| H548        | aaaccagaagtattgatagctaattcgatcatcag                                                                                                    |
| H549        | aaaactgatgacgaattagctatcataacttctgg                                                                                                    |
| H550        | aaacatgctccaatcgataaacaattagataaacg                                                                                                    |
| H551        | aaaacgtttatctaattgtttatcgattggagcat                                                                                                    |
| L400        | cgaaattttttagacaaaaatagtc                                                                                                              |
| L2 Target   | gagtggaaggatgccagtgataagtggaatgccatgtgggctgtcaaaattgagc                                                                                |
| L2 RC       | gctcaatttttgacagcccacatggcattccacttatcactggcatccttccactc                                                                               |
| L2 AG PAM   | gagtggaaggatgccagtgataagtggaatgccatgtaggctgtcaaaattgagc                                                                                |
| L2 AG RC    | gctcaatttttgacagcctacatggcattccacttatcactggcatccttccactc                                                                               |
| L2 crRNA    | gugauaaguggaauGCCAUGGUUUUAGAGCUAUGCUGUUUUUG                                                                                            |
| tracrRNA    | ggacagcauagcaaguuaaaauaaggcuaguccguuuaucaacuugaaaaaguggcaccgaguc<br>ggugcuuuuu                                                         |
| L1 sgRNA    | gacgcauaaagaugagacgcguuuuagagcuauGCUGUUUUUGGAAACAAAACAGCAUAGCAAG<br>uuuuuuuagguccguuuaucaacuugaaaaaguggcaccgagucggugcuuuuuuuugga<br>uc |



**SUPPLEMENTARY DATA FILE S1. Related to Experimental Procedures. Analysis of next generation sequencing data.**

## **SUPPLEMENTARY EXPERIMENTAL PROCEDURES**

### **Spacer acquisition assay during phage infection**

Spacer acquisition assays of cells harboring the full CRISPR system of *Streptococcus pyogenes* were performed as described previously, both in liquid and on plate (Heler et al., 2015). For plate acquisition assays, overnight cultures were launched from single colonies and diluted to equal optical densities. CRISPR arrays were amplified by PCR with primer pairs L400-H050 or L400-H052 (Supplementary table S3).

### **Spacer acquisition assay in the absence of phage infection**

Spacer acquisition assays were conducted by passaging cultures carrying the full *S. pyogenes* CRISPR system (expressing wtCas9 or hCas9) in the absence of phage for 10 days. Each day, the cultures were diluted 1:100 in fresh media with appropriate antibiotics. The pCRISPR plasmids had barcoded leader sequences. Spacer acquisition was quantified by PCR amplification of the CRISPR array followed by NGS.

### **Phage propagation assay**

Overnight cultures were launched from single colonies. Serial dilutions of a stock of phage  $\phi$ NM4 $\gamma$ 4 (Goldberg et al., 2014) or  $\phi$ 85 (Mazmanian et al., 2000) were spotted on fresh soft heart infusion agar (HIA) lawns of targeting cells containing chloramphenicol 10  $\mu$ g ml<sup>-1</sup> and 5 mM CaCl<sub>2</sub>. Plates were incubated at 37 °C overnight and interference efficiency was measured in plaque forming units (pfu).

### **Bacterial growth curves**

Overnight cultures were launched from single colonies and diluted 1:100 in BHI. After 1 hour of growth, optical density at 600 nm (OD<sub>600</sub>) was measured for each culture, and samples were brought to equal cell densities and loaded into 96-well plates along with  $\phi$ NM4 $\gamma$ 4 at MOI =1. Measurements were taken every 10 minutes for 24 hours.

### **Cas9 target cleavage assay**

Cas9 was expressed and purified as previously described (Jinek et al., 2012). The I473F Cas9 expression vector was cloned by around-the-horn mutagenic PCR (Moore and Prevelige, 2002). crRNA and tracrRNA were transcribed using T7 RNA polymerase from single-stranded DNA templates and hybridized as previously described (Jinek et al., 2012; Sternberg et al., 2014). L2 oligonucleotides (Supplementary table S3) were hybridized to generate the two different target DNA duplexes and native PAGE-purified before 5' radiolabeling using [ $\gamma$ -<sup>32</sup>P]-ATP (Perkin-Elmer) and T4 polynucleotide kinase (New England Biosciences).

Cleavage assays were carried out essentially as previously described (Sternberg et al., 2014). In brief, Cas9 and crRNA:tracrRNA were allowed to form an RNP complex before addition of target DNA. Final concentration of RNP was 100 nM and target was 1 nM. Reactions were incubated at room temperature, and aliquots were taken at 0.25, 0.5, 1, 2, 5, 10, 30, and 60 minutes and quenched by addition of an equal volume of 95% formamide and 50 mM EDTA. Samples were run on 10% urea-PAGE, visualized by phosphorimaging, and quantified using ImageQuant (GE Healthcare).

### **Plasmid construction**

All cloning was performed using chemically competent *S. aureus* cells, as previously described (Goldberg et al., 2014). The sequences of all the oligonucleotides used in for plasmid construction are in Supplementary table S3. Bsal cloning was used to construct pRH065 and pRH079 by inserting TAG (annealed primers H024-H025 containing compatible Bsal overhangs) and NGG-adjacent (H029-H030) spacers targeting  $\phi$ NM4 $\gamma$ 4 into pDB114 (Bikard et al., 2014). The mutant *cas9* library was constructed via 2-piece Gibson assembly (Gibson et al., 2009) by replacing wild-type *cas9* on pRH065 with error-prone *cas9* amplicons using primer pairs H294-H295 and H293-H296, respectively. The I473F mutation (codon ATT to TTT) was introduced on pRH065, pRH079, pWJ40 (Goldberg et al., 2014) and pDB114 by around-the-horn PCR (Moore and Prevelige, 2002) with primer pair H103-H104 to create plasmids pRH096, pRH176, pRH180 and pRH305. Bsal cloning was used to construct pRH306, pRH307 and pRH308 by inserting AAG (H546-H547), GAG (H548-H549) and CAG (H550-H551)-adjacent spacers targeting  $\phi$ NM4 $\gamma$ 4 into pRH305. In addition, mutations R425G (AGA to GGA), I473A (ATT to GCT), K500I (AAA to ATA), S701G (AGT to GGT), P756L (CCA to CTA) and A1032G (GCA to GGA) were each introduced on both pRH065 and pWJ40 by around-the-horn PCR with primer pairs H101-H102, H207-H208, H105-H106, H107-H108, H109-H110 and H111-H112 respectively. The randomized pWJ40 and pRH180 leader-barcoded libraries used for MiSeq were each constructed by 2-piece Gibson assembly with primers pairs H378-H294 and H379-H293.

### **Plasmid loss assays**

To assess plasmid loss, cultures carrying the full *S. pyogenes* CRISPR system (expressing wtCas9 or hCas9) were passaged in the absence of phage for 10 days. Each day, the cultures were diluted 1:100 in fresh media with no antibiotics. At the end of the experiment, dilutions of the cells were plated on plates without antibiotic (to count the total number of cells) and with antibiotic (to count the number of cells that still carried the pCRISPR plasmids).

### **Cas9 competition assays**

Plasmids pWJ40 and pRH180 carrying the full *S. pyogenes* CRISPR system (expressing wtCas9 and hCas9, respectively) were transformed into *S. aureus* RN4220 (no antibiotic resistance) and OS2 (erythromycin resistance), respectively. Overnight cultures of RN4220:pWJ40 and OS2:pRH180 launched from single colonies were diluted 1:100 in BHI. After 1 hour of growth, optical density at 600 nm (OD<sub>600</sub>) was measured for each culture, and samples were brought to equal cell densities. The two cultures were mixed in a 1:1 ratio and passaged for 5 days. Every day, the mixed culture was diluted 1:100 in fresh media and dilutions of the cells were plated on plates with chloramphenicol (to count the total number of cells) and plates with chloramphenicol and erythromycin (to count the number of cells that carried the hCas9 plasmid).

### **Protein sequence alignments**

Amino acid sequences of Cas9 were obtained from the NCBI Protein database and aligned with Clustal Omega (<http://www.ebi.ac.uk/Tools/msa/clustalo/>). Alignments were visualized with Jalview (Waterhouse et al., 2009).

## SUPPLEMENTARY REFERENCES

- Bikard, D., Euler, C.W., Jiang, W., Nussenzweig, P.M., Goldberg, G.W., Duportet, X., Fischetti, V.A., and Marraffini, L.A. (2014). Exploiting CRISPR-Cas nucleases to produce sequence-specific antimicrobials. *Nat Biotechnol* 32, 1146-1150.
- Gibson, D.G., Young, L., Chuang, R.Y., Venter, J.C., Hutchison, C.A., 3rd, and Smith, H.O. (2009). Enzymatic assembly of DNA molecules up to several hundred kilobases. *Nat Methods* 6, 343-345.
- Goldberg, G.W., Jiang, W., Bikard, D., and Marraffini, L.A. (2014). Conditional tolerance of temperate phages via transcription-dependent CRISPR-Cas targeting. *Nature* 514, 633-637.
- Heler, R., Samai, P., Modell, J.W., Weiner, C., Goldberg, G.W., Bikard, D., and Marraffini, L.A. (2015). Cas9 specifies functional viral targets during CRISPR-Cas adaptation. *Nature* 519, 199-202.
- Jinek, M., Chylinski, K., Fonfara, I., Hauer, M., Doudna, J.A., and Charpentier, E. (2012). A programmable dual-RNA-guided DNA endonuclease in adaptive bacterial immunity. *Science* 337, 816-821.
- Mazmanian, S.K., Liu, G., Jensen, E.R., Lenoy, E., and Schneewind, O. (2000). *Staphylococcus aureus* sortase mutants defective in the display of surface proteins and in the pathogenesis of animal infections. *Proc Natl Acad Sci U S A* 97, 5510-5515.
- Moore, S.D., and Prevelige, P.E., Jr. (2002). A P22 scaffold protein mutation increases the robustness of head assembly in the presence of excess portal protein. *J Virol* 76, 10245-10255.
- Sternberg, S.H., Redding, S., Jinek, M., Greene, E.C., and Doudna, J.A. (2014). DNA interrogation by the CRISPR RNA-guided endonuclease Cas9. *Nature* 507, 62-67.
- Waterhouse, A.M., Procter, J.B., Martin, D.M., Clamp, M., and Barton, G.J. (2009). Jalview Version 2--a multiple sequence alignment editor and analysis workbench. *Bioinformatics* 25, 1189-1191.
